# Supplementary material for: Designing safer nanohybrids: stability and ecotoxicological assessment of graphene oxide–gold nanoparticle hybrids in embryonic zebrafish
Source: Royal Society of Chemistry journal article supplement (doi:10.1039/d4en01173b), 2025-01-01
Supplement: d4en01173b1.pdf [file d4en01173b1.pdf]

## Supplementary Information

### Designing Safer Nanohybrids: Stability and Ecotoxicological Assessment of Graphene Oxide-Gold nanoparticles Hybrids in Embryonic Zebrafish

*Bashiru Ibrahim<sup>a\*</sup>, Taiwo Hassan Akere<sup>a</sup>, Pankti Dhumal<sup>a</sup>, Eugenia Valsami-Jones<sup>a</sup>, Swaroop Chakraborty<sup>a\*</sup>*

<sup>a</sup>School of Geography, Earth & Environmental Sciences, University of Birmingham, Edgbaston, UK

\*Corresponding author: [b.ibrahim@bham.ac.uk](mailto:b.ibrahim@bham.ac.uk), [s.chakraborty@bham.ac.uk](mailto:s.chakraborty@bham.ac.uk)

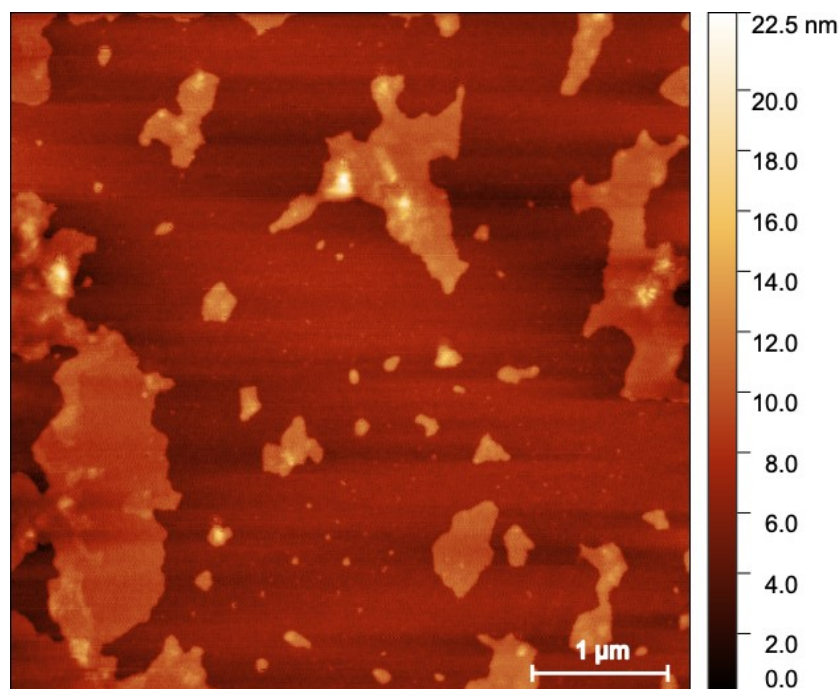

**Figure S1:** Atomic force microscope topographic image of Graphene oxide

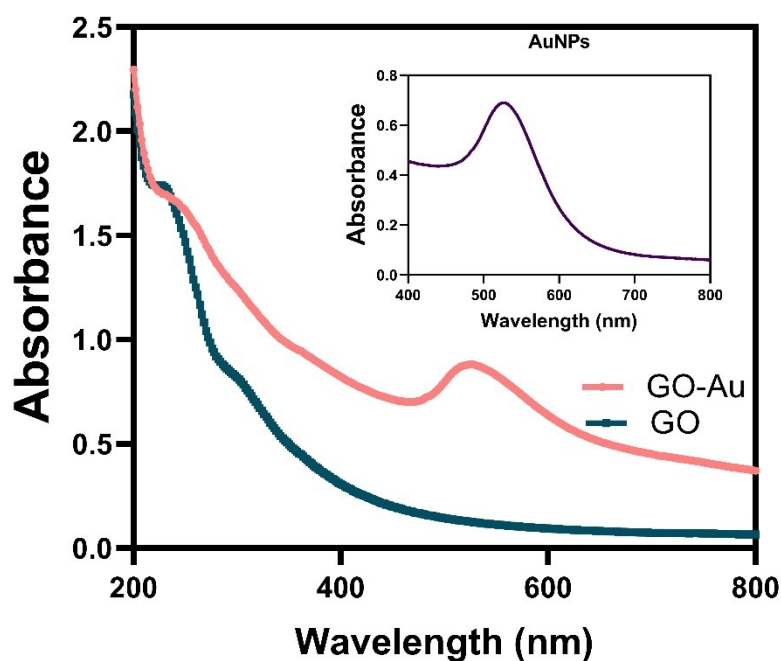

**Figure S2:** Absorbance spectra of AuNPs, GO and GO-Au dispersed in ultrapure water characterised using UV-Vis spectroscopy.

**Table S1:** Analysis of elemental composition of GO

| Name | Peak BE | FWHM eV | Area (P) CPS.eV | Atomic % | Q |
|------|---------|---------|-----------------|----------|---|
| O1s  | 533.18  | 2.95    | 461261.53       | 31.85    | 1 |
| C1s  | 286.65  | 4.39    | 386685.75       | 68.15    | 1 |

**Table S2:** Analysis of elemental composition of GO-Au

| Name | Peak BE | FWHM eV | Area (P) CPS.eV | Atomic % | Q |
|------|---------|---------|-----------------|----------|---|
| O1s  | 533.18  | 3.1     | 1041814.74      | 29.83    | 1 |
| C1s  | 286.68  | 4.5     | 918662.63       | 67.15    | 1 |
| Au4f | 85.09   | 3.06    | 776941.79       | 3.02     | 1 |

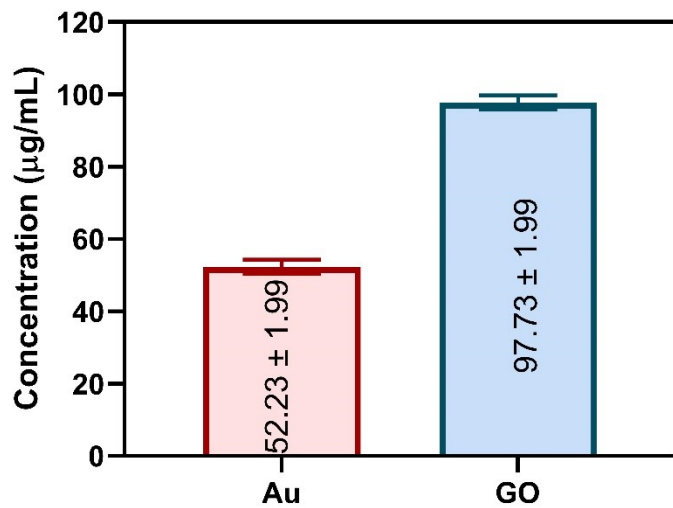

**Figure S3: Elemental composition of Au in GO-AuNPs nanohybrids using ICP-MS**

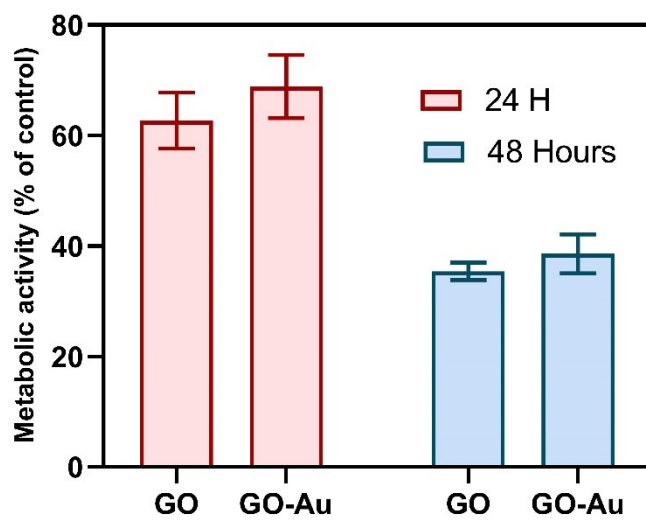

**Figure S4: Comparison of Metabolic activity between GO at 100 µg/ml and GO-Au at ~100 µg/ml of GO concentration.**

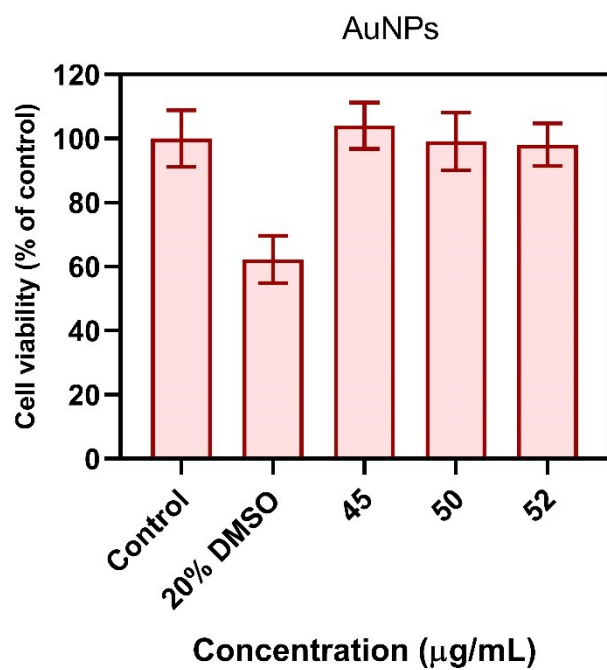

**Figure S5: Cell viability of AuNPs at various concentrations**

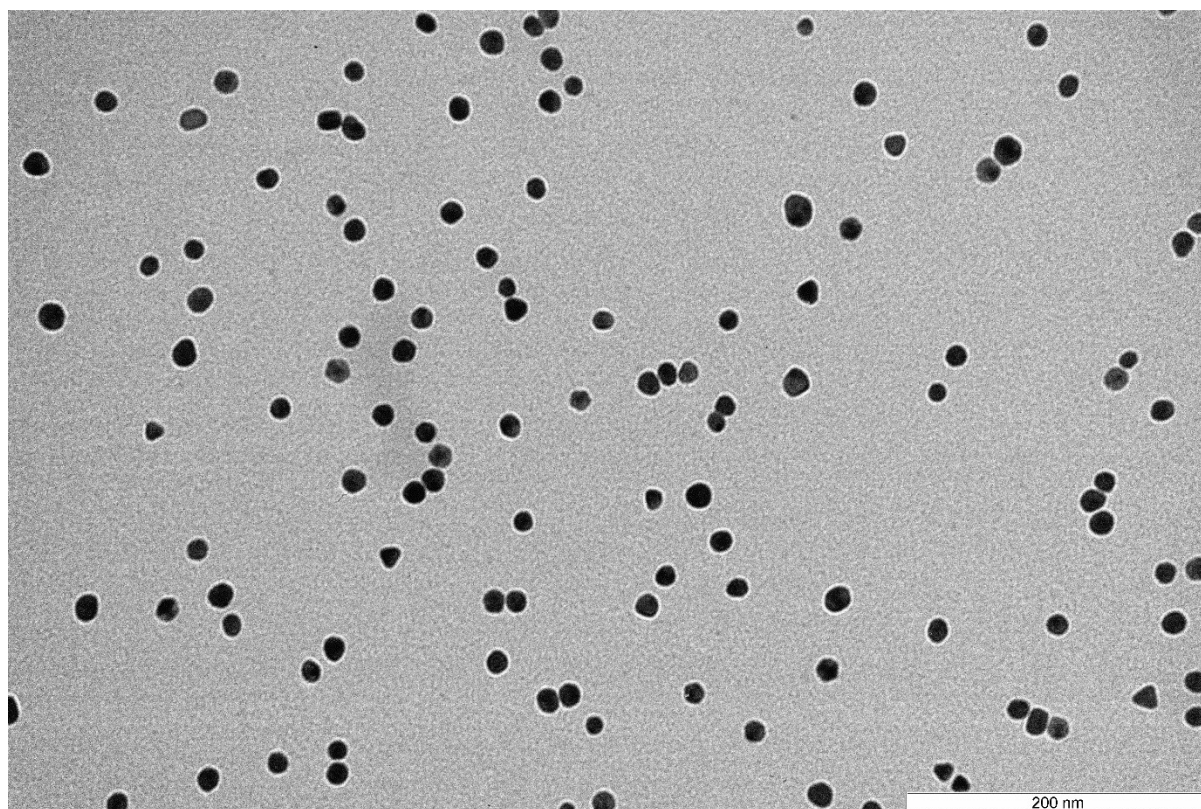

**Figure S6: Morphology and distribution of AuNPs**
